# Supplementary material
Source: PubMed Central journal article supplement (PMC3741495)

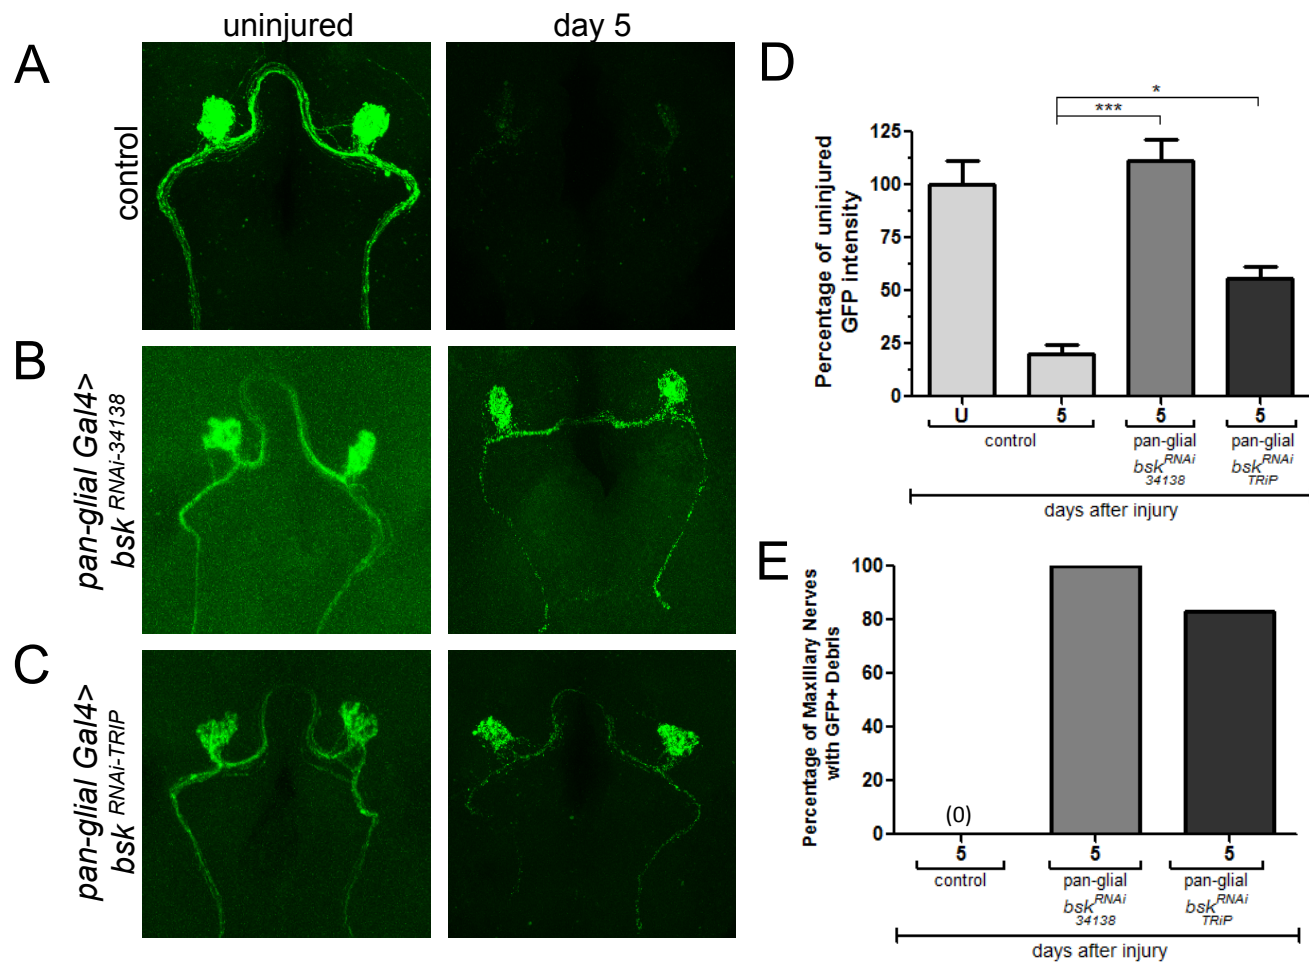

Supplementary Figure 1 – MacDonald *et al.*

Supplement: cdd201330x1.pdf [file cdd201330x1.pdf]

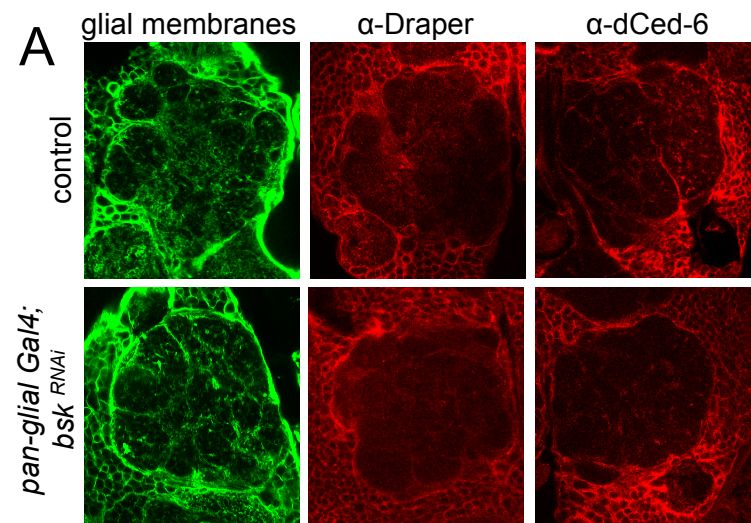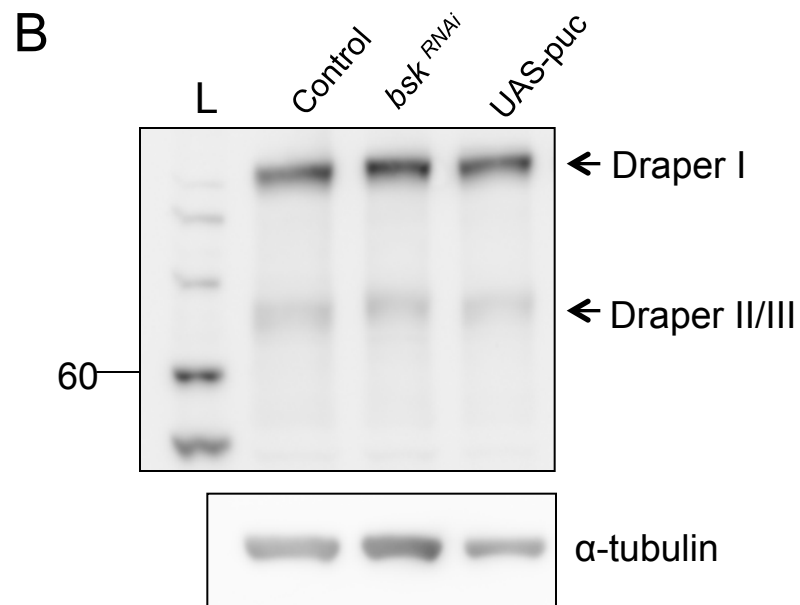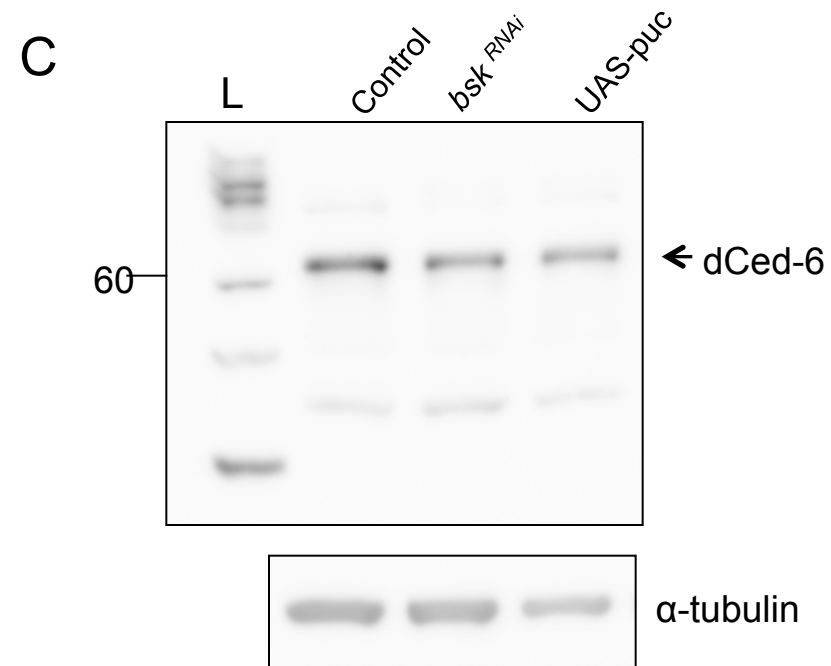

Supplementary Figure 2 – MacDonald *et al.*

Supplement: cdd201330x2.pdf [file cdd201330x2.pdf]

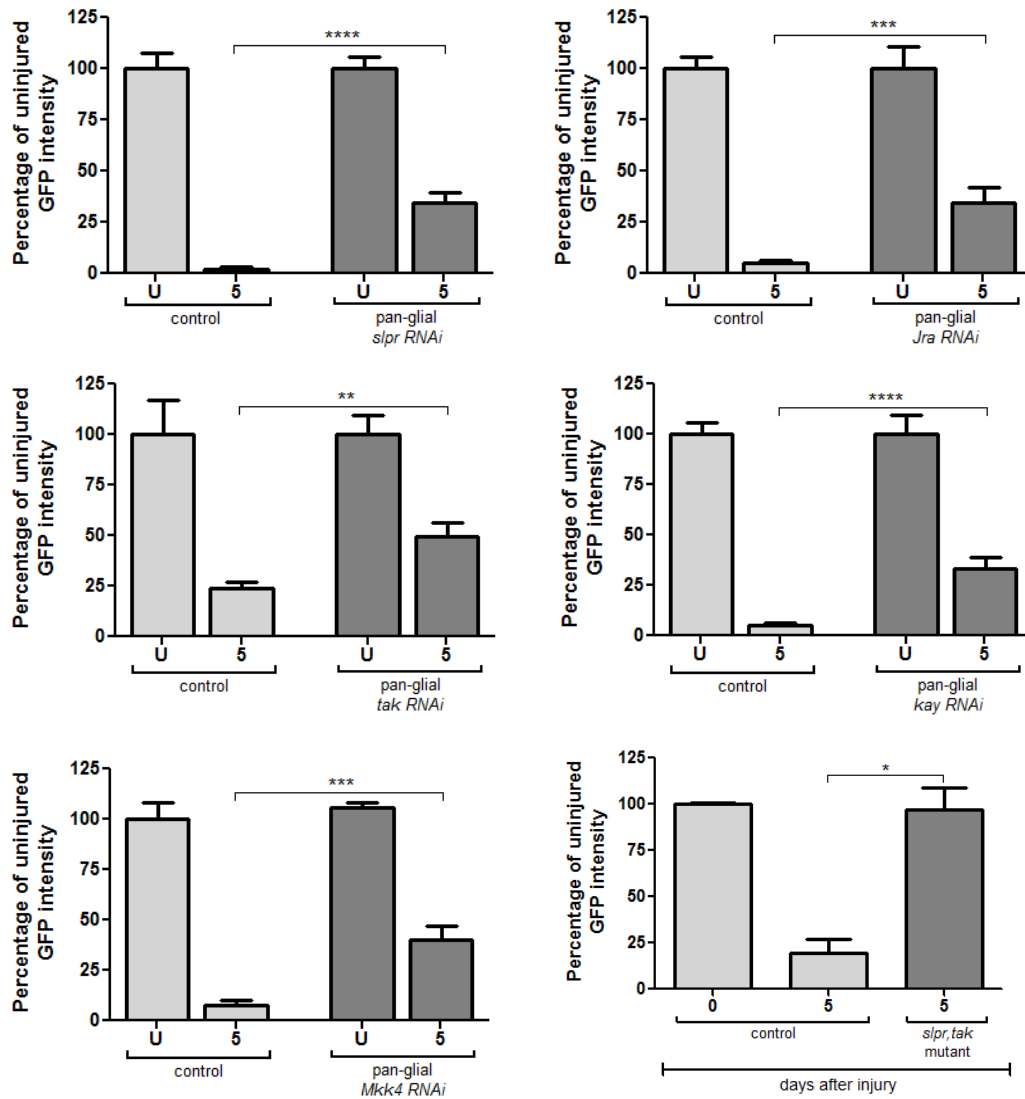

Supplementary Figure 3 – MacDonald *et al.*

Supplement: cdd201330x3.pdf [file cdd201330x3.pdf]

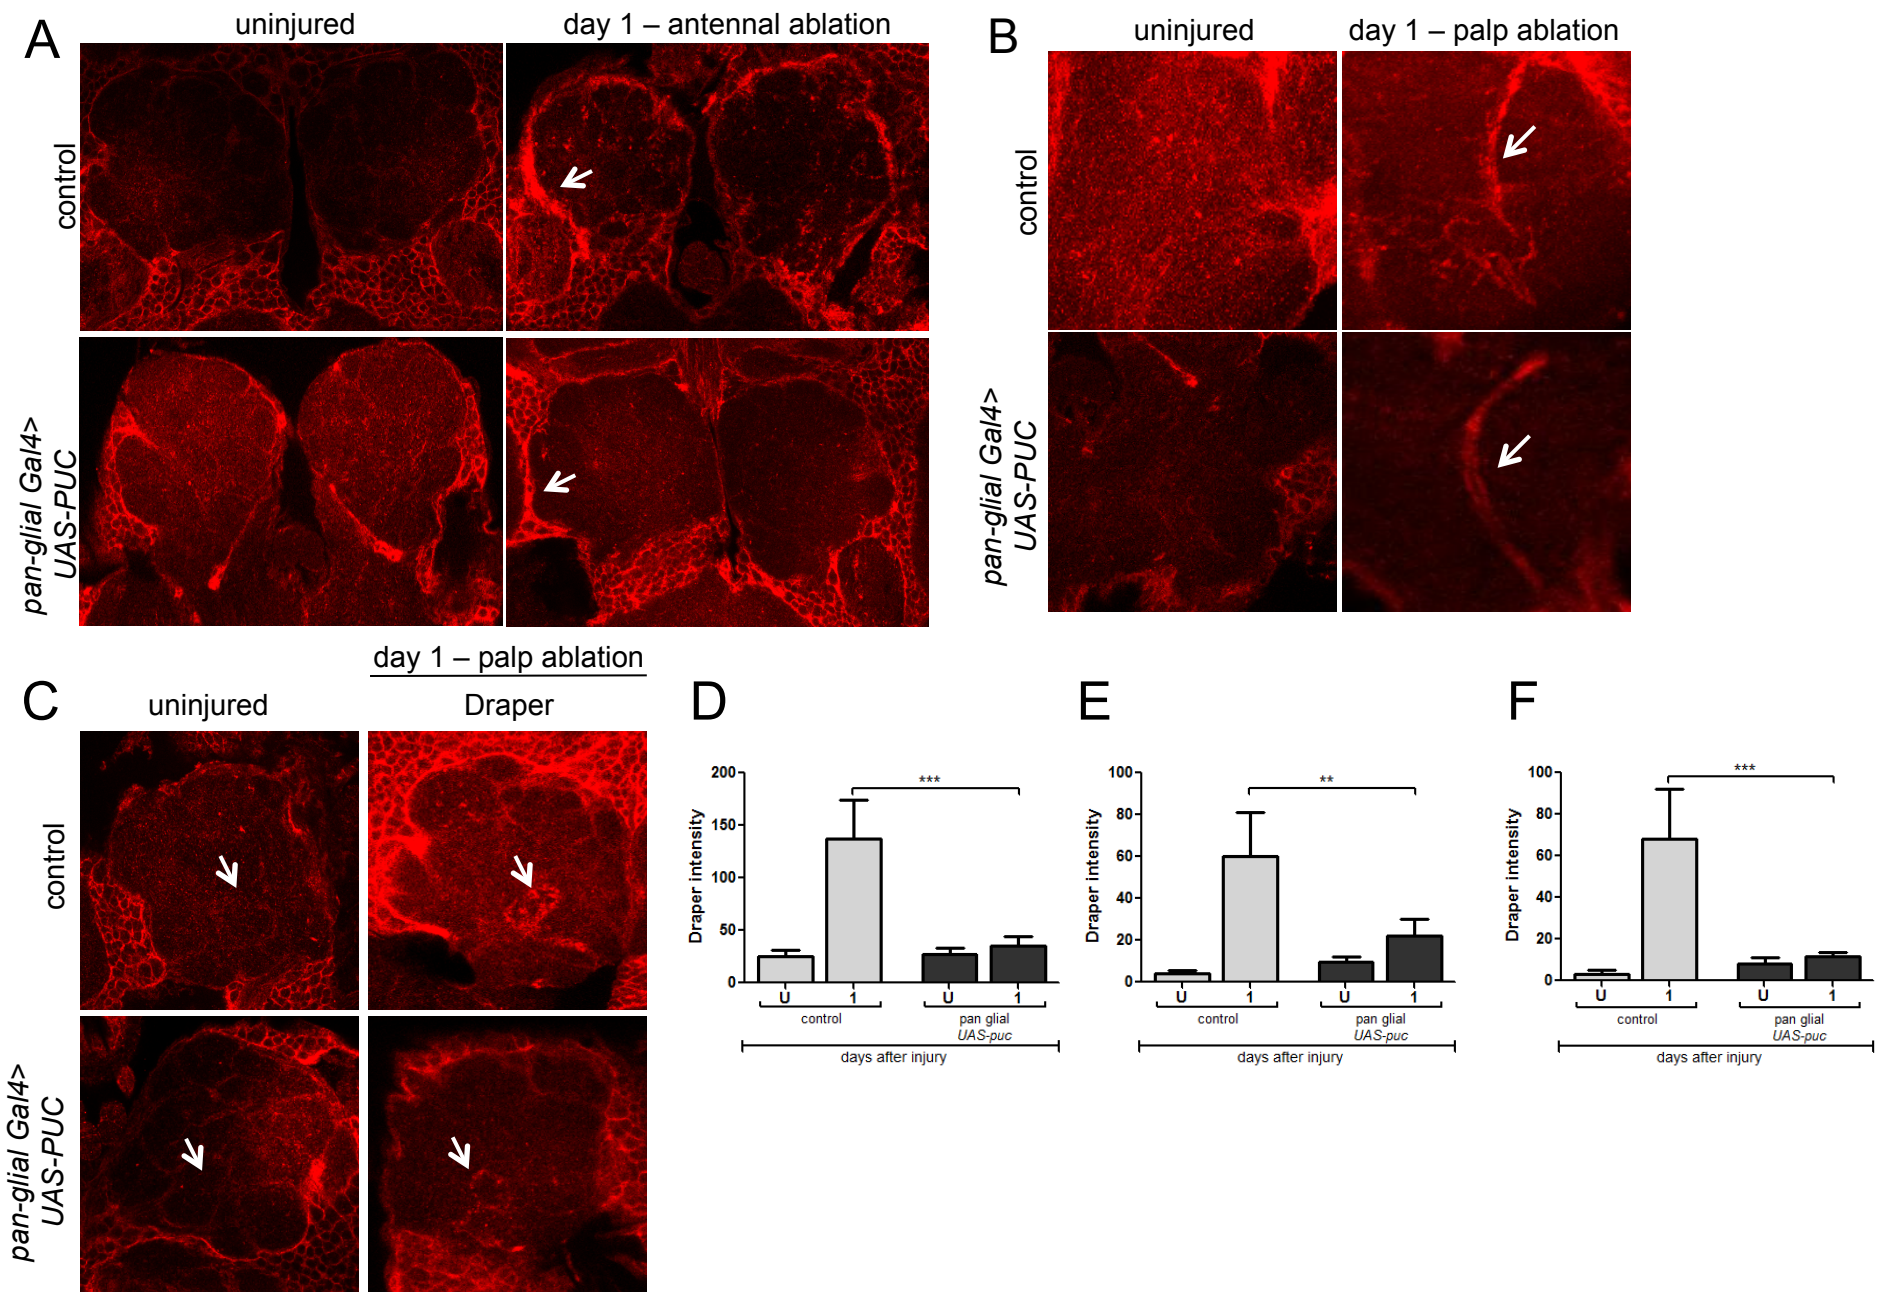

Supplementary Figure 5 – MacDonald *et al.*

Supplement: cdd201330x5.pdf [file cdd201330x5.pdf]

**A**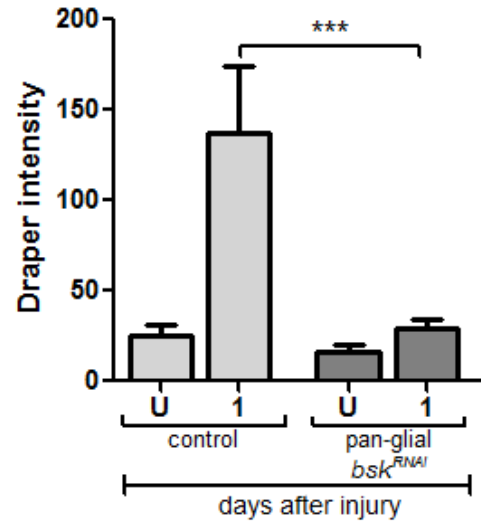**B**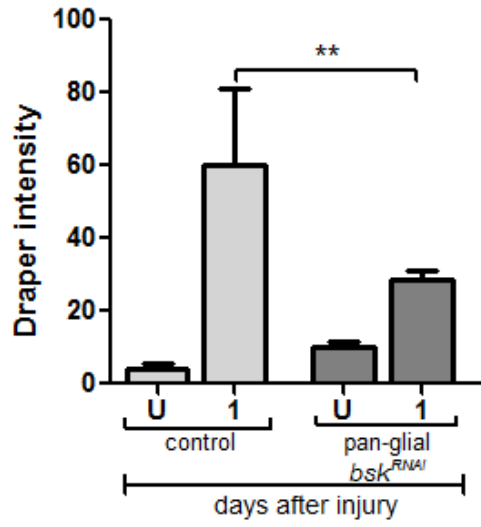**C**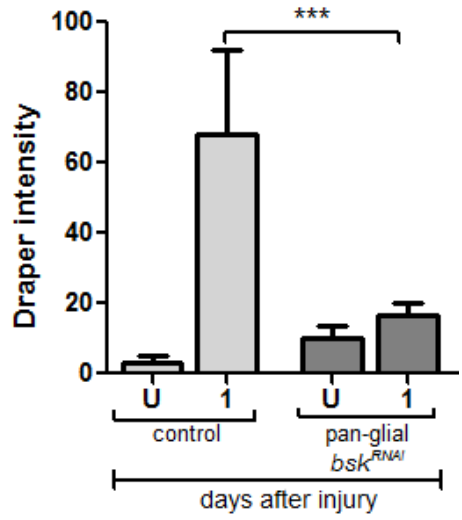

Supplementary Figure 6 – MacDonald *et al.*

Supplement: cdd201330x6.pdf [file cdd201330x6.pdf]
